# Supplementary material for: Source Apportionment and Health Risk Assessment of Metal Elements in PM2.5 in Central Liaoning’s Urban Agglomeration
Source: MDPI journal article supplement (doi:10.3390/atmos12060667), 2021-05-23
Supplement: s1 [file s1]

# Source Apportionment and Health Risk Assessment of Metal Elements in PM<sub>2.5</sub> in Central Liaoning's Urban Agglomeration

Qingyuan Guo<sup>1,2,†</sup>, Liming Li<sup>1,†</sup>, Xueyan Zhao<sup>1</sup>, Baohui Yin<sup>1</sup>, Yingying Liu<sup>1</sup>, Xiaoli Wang<sup>2</sup>, Wen Yang<sup>1</sup>, Chunmei Geng<sup>1,\*</sup>, Xinhua Wang<sup>1,\*</sup> and Zhipeng Bai<sup>1</sup>

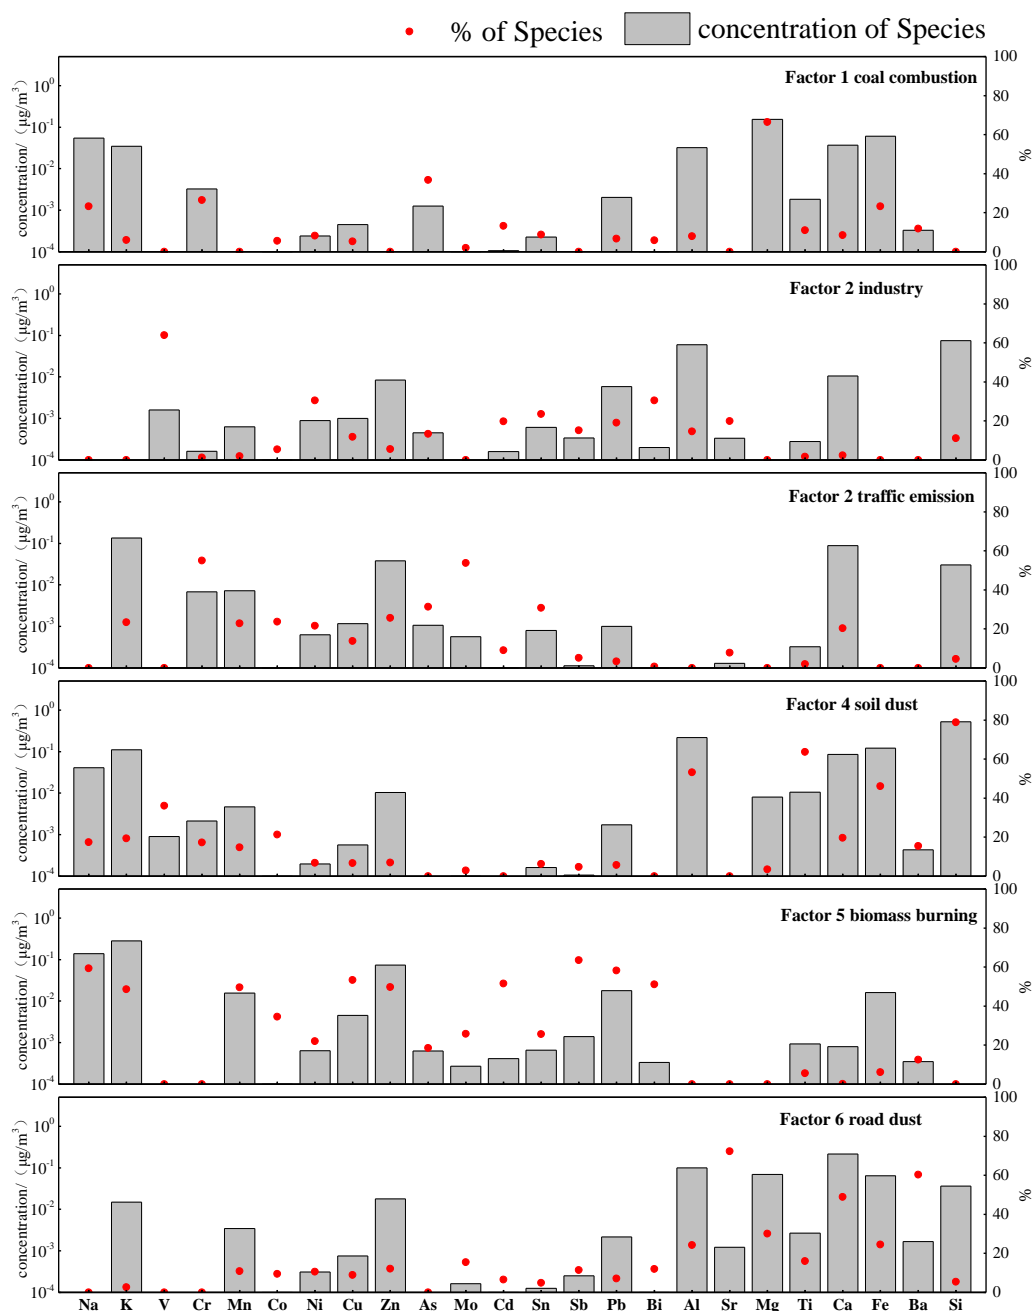

**Figure S1.** The source profiles of trace elements in PM<sub>2.5</sub> by PMF analysis at the six cities (including Shenyang, Anshan, Fushun, Bengxi, Liaoyang and Tieling) which demonstrate the concentration and percentage of the species to each factor.

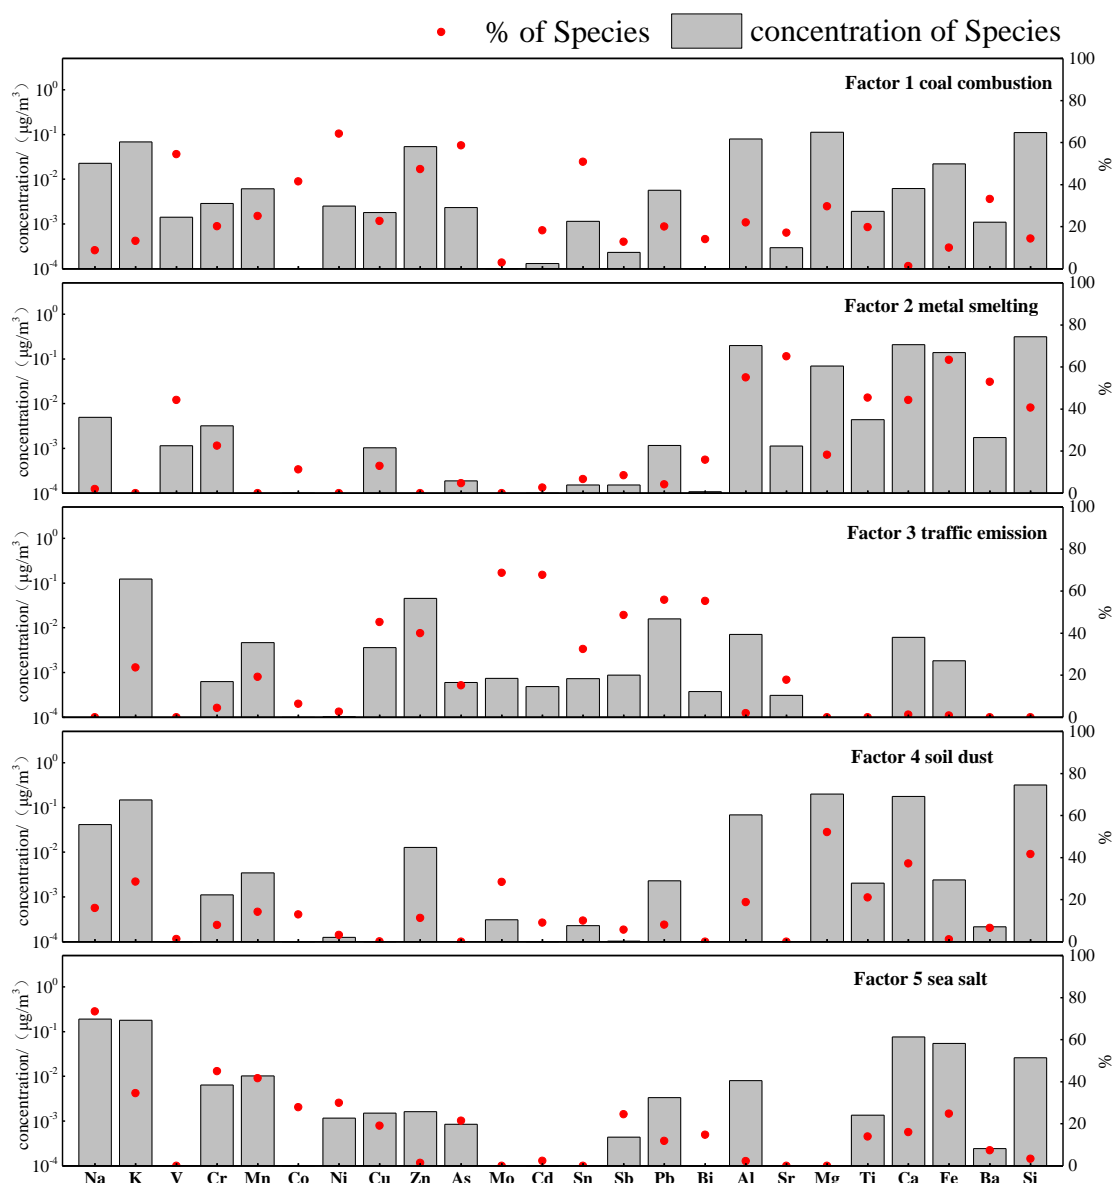

**Figure S2.** The source profiles of trace elements in PM<sub>2.5</sub> by PMF analysis at Yingkou which demonstrate the concentration and percentage of the species to each factor.

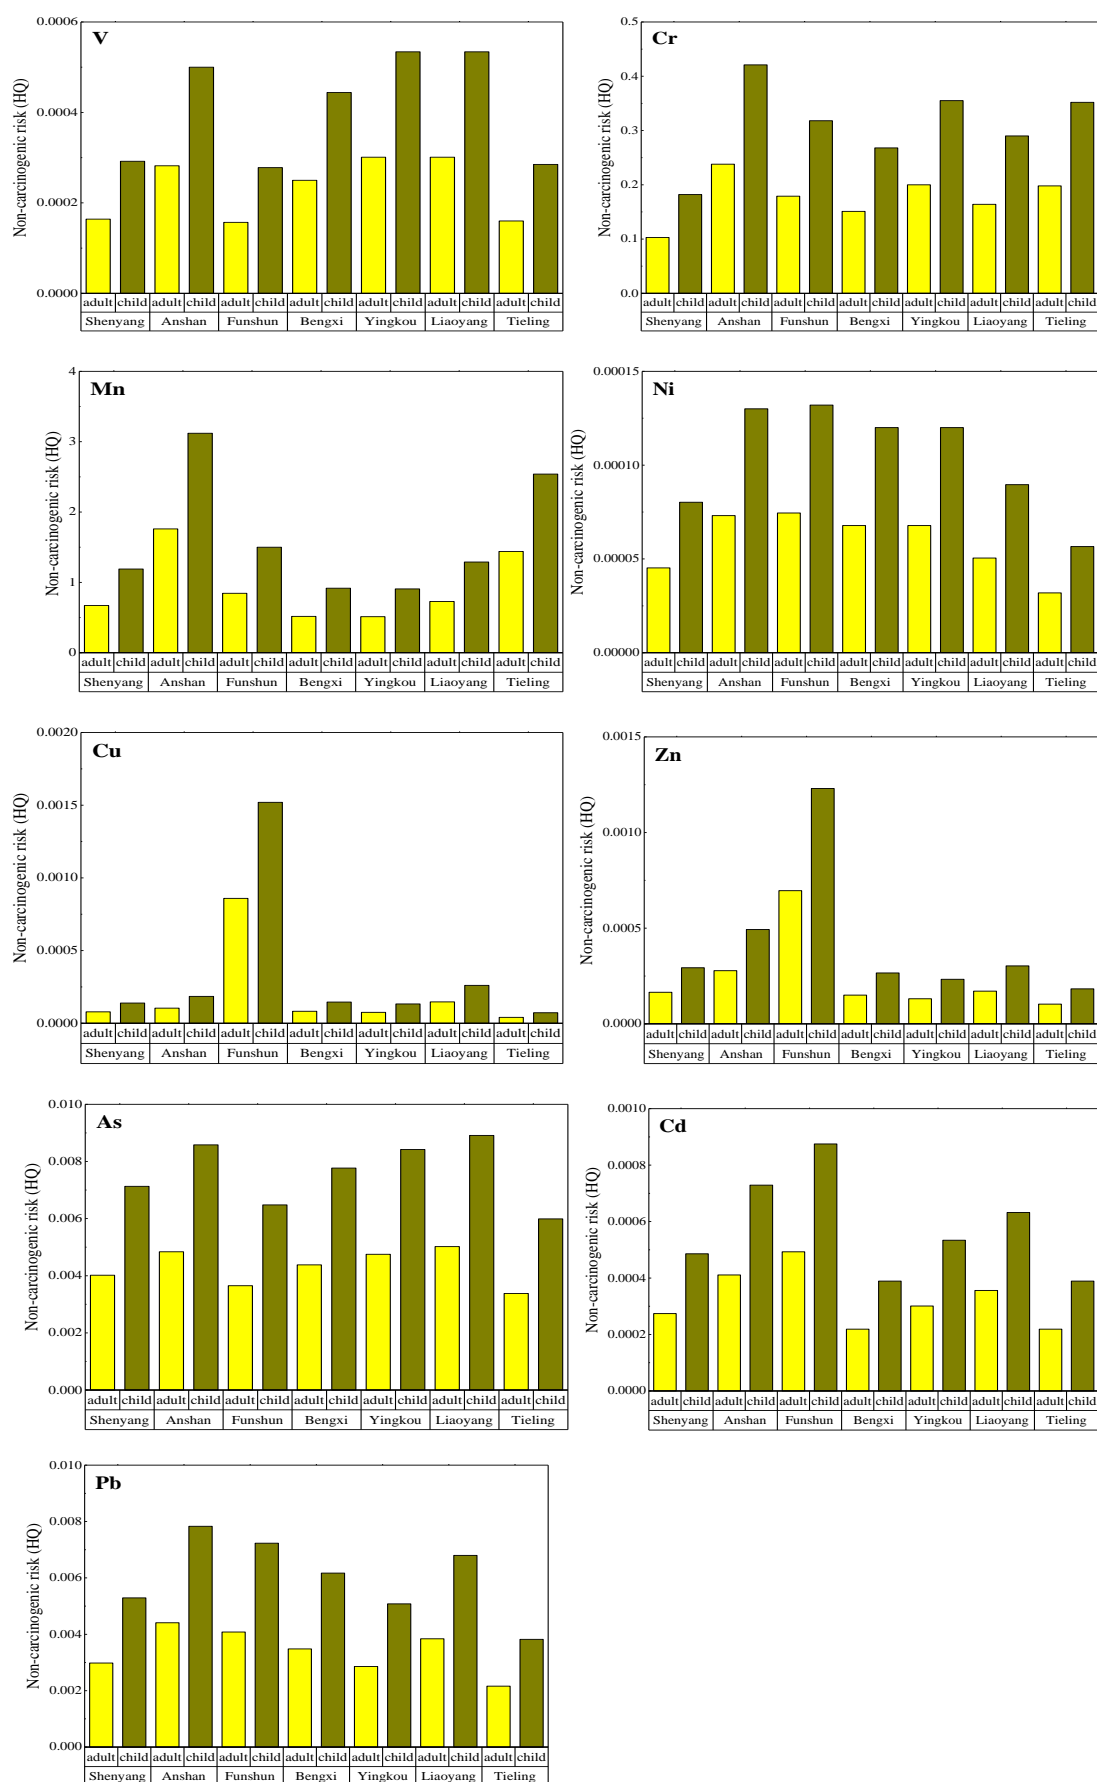

**Figure S3.** Non-carcinogenic risks of nine metal elements via respiratory pathway at seven cities, the yellow columns represent adult and the brown ones represent child.

**Table S1.** COD values of elements concentration in PM<sub>2.5</sub> at different sampling sites in different cities. (a) is three sites in Shenyang, (b) is two sites in Anshan.

| (a)  |      |      |    | (b)  |      |    |
|------|------|------|----|------|------|----|
| Site | S1   | S2   | S3 | Site | S4   | S5 |
| S1   | 1    |      |    | S4   | 1    |    |
| S2   | 0.13 | 1    |    | S5   | 0.15 | 1  |
| S3   | 0.13 | 0.12 | 1  |      |      |    |

**Table S2.** Exposure parameter values used in the risk assessment calculations.

| Variable | Value                                   | References                                            |
|----------|-----------------------------------------|-------------------------------------------------------|
| EF       | 350 days/year                           | (Agarwal et al., 2017)                                |
| ED       | 6 years for children                    | (US EPA (U.S. Environmental Protection Agency), 2009) |
|          | 24 years for adults                     | (US EPA (U.S. Environmental Protection Agency), 2009) |
| AT       | 70 year × 365 days/year for cancer risk | (US EPA (U.S. Environmental Protection Agency), 1989) |
|          | ED × 365 days/year for non-cancer risk  | (US EPA (U.S. Environmental Protection Agency), 1989) |
| BW       | 15 kg for children                      | (Agarwal et al., 2017)                                |
|          | 70 kg for adult                         | (Agarwal et al., 2017)                                |
| InhR     | 7.6 m <sup>3</sup> /day for children    | (US EPA (U.S. Environmental Protection Agency), 1989) |
|          | 20 m <sup>3</sup> /day for adult        | (Agarwal et al., 2017)                                |

Note: InhR—inhale rate; BW—body weight; EF—exposure frequency; ED—exposure duration; AT—averaging time.

**Table S3.** The reference dose of non-carcinogenic metals and the slope factor of carcinogenic metals.

| Element                | V                    | Cr                    | Mn                    | Ni                    | Cu                    | Zn  | As                   | Cd                   | Pb                    |
|------------------------|----------------------|-----------------------|-----------------------|-----------------------|-----------------------|-----|----------------------|----------------------|-----------------------|
| Rfd(Feng et al., 2016) | 7.0×10 <sup>-3</sup> | 2.86×10 <sup>-5</sup> | 1.43×10 <sup>-5</sup> | 2.06×10 <sup>-2</sup> | 4.02×10 <sup>-2</sup> | 0.3 | 3.0×10 <sup>-4</sup> | 1.0×10 <sup>-3</sup> | 3.52×10 <sup>-3</sup> |
| SF(Feng et al., 2016)  | -                    | 42                    | -                     | 0.84                  | -                     | -   | 15.1                 | 6.3                  | -                     |

Note: Rfd—reference dose; SFa—slope factor.
